# Supplementary material for: Mutual promotion effect between aerosol particle liquid water and nitrate formation lead to severe nitrate-dominated particulate matter pollution and low visibility
Source: Copernicus journal article supplement (doi:10.5194/acp-2019-716), 2019-09-26
Supplement: Supplementary file 1 [file acp-2019-716-supplement.pdf]

# Supporting Information for

## Mutual promotion effect between aerosol particle liquid water and nitrate formation lead to severe nitrate-dominated particulate matter pollution and low visibility

5 Yu Wang<sup>1,2,a</sup>, Ying Chen<sup>3,a</sup>, Zhijun Wu<sup>1,4,5,\*</sup>, Dongjie Shang<sup>1</sup>, Yuxuan Bian<sup>6</sup>, Zhuofei Du<sup>1,b</sup>, Sebastian H. Schmitt<sup>4,7,c</sup>, Rong Su<sup>1,d</sup>, Georgios I. Gkatzelis<sup>4,7,e,f</sup>, Patrick Schlag<sup>4,7,g</sup>, Thorsten Hohaus<sup>4,7</sup>, Aristeidis Voliotis<sup>2</sup>, Keding Lu<sup>1,4,5</sup>, Limin Zeng<sup>1,4</sup>, Chunsheng Zhao<sup>8</sup>, Rami Alfarra<sup>2,9</sup>, Gordon McFiggans<sup>2</sup>, Alfred Wiedensohler<sup>10</sup>, Astrid Kiendler-Scharr<sup>4,7</sup>, Yuanhang Zhang<sup>1,4,5</sup>, Min Hu<sup>1,4,5</sup>

10 <sup>1</sup>State Key Joint Laboratory of Environmental Simulation and Pollution Control, College of Environmental Sciences and Engineering, Peking University, Beijing 100871, China

<sup>2</sup>Centre for Atmospheric Science, School of Earth and Environmental Sciences, The University of Manchester, Manchester M13 9PL, UK

<sup>3</sup>Lancaster Environment Centre, Lancaster University, Lancaster, LA1 4YQ, UK

15 <sup>4</sup>International Joint Laboratory for Regional Pollution Control, 52425 Jülich, Germany, and Beijing 100871, China

<sup>5</sup>Collaborative Innovation Center of Atmospheric Environment and Equipment Technology, Nanjing University of Information Science and Technology, Nanjing 210044, China

<sup>6</sup>State Key Laboratory of Severe Weather, Chinese Academy of Meteorological Sciences, Beijing, 100081, China

20 <sup>7</sup>Institute for Energy and Climate Research, IEK-8: Troposphere, Forschungszentrum Jülich, 52425 Jülich, Germany

<sup>8</sup>Department of Atmospheric and Oceanic Sciences, School of Physics, Peking University, Beijing 100871, China

25 <sup>9</sup>National Centre for Atmospheric Science, School of Earth and Environmental Sciences, The University of Manchester, Manchester, M13 9PL, UK

<sup>10</sup>Leibniz Institute for Tropospheric Research, 04318 Leipzig, Germany

<sup>a</sup>These authors contribute equally to this work

30 <sup>b</sup>Now at Center for Urban Transport Emission Research & State Environmental Protection Key Laboratory of Urban Ambient Air Particulate Matter Pollution Prevention and Control, College of Environmental Science and Engineering, Nankai University, Tianjin, 300071, China

<sup>c</sup>Now at TSI GmbH, 52068 Aachen, Germany

<sup>d</sup>Now at Guangdong Science and Technology Monitoring and Research Center, Guangzhou 510033, China

<sup>e</sup>Now at NOAA Earth Systems Research Laboratory, Boulder, Colorado 80305, United States

35 <sup>f</sup>Now at Cooperative Institute for Research in Environmental Sciences, Boulder, Colorado 80309, United States

<sup>g</sup>Now at Shimadzu Deutschland GmbH, 47269 Duisburg, Germany

Correspondence to: Zhijun Wu ([zhijunwu@pku.edu.cn](mailto:zhijunwu@pku.edu.cn))

## ***Contents of this file***

40 ***Text S1*** Measurement and methods (including Figure S1 – S5)

***Results*** Figure S6 – S9

***Table S1***

***Figure S1.*** The time series of mass concentration of POA and SOA in non-refractory  $PM_{10}$  from ME2  
45 (left axis) and the fraction of SOA in total organic (right axis) during the period from 29 February to 5  
March, 2016.

***Figure S2.*** The exemplified size distribution of  $dM/d\log D_p$  and the classification of re-arranged  
aerodynamic diameter size range.

***Figure S3.*** Average size distribution of  $NH_4^+$ ,  $NO_3^-$ ,  $SO_4^{2-}$ , Cl<sup>-</sup>, Org (in stokes diameter), in the period of  
50 February 29 to March 5, 2016.

***Figure S4.*** Comparison of particle number size distribution from measurement and four-mode  
lognormal fitting method.

***Figure S5.*** Comparison of sized-resolved  $\kappa$  from H-TDMA measurement and the calculated size  
distribution of  $\kappa$  from 3 nm to 10  $\mu m$ .

55 ***Figure S6.*** The time series of meteorological parameters during the period of February 29 to March 5,  
2016.

**Figure S7.** Time series of aerosol particle surface area in the absence and presence of aerosol particle liquid water (Left axis), as well as the ratio for a difference of surface area in the presence and absence of liquid water  $((\text{Surface Area}_{\text{wet}} - \text{Surface Area}_{\text{dry}})/\text{Surface Area}_{\text{dry}})$  (Right axis) during  
60 February 29 to March 5, 2016.

**Figure S8.** Time series of aerosol particle volume in the absence and presence of aerosol particle liquid water (Left axis), as well as the ratio for difference of aerosol particle volume in the presence and absence of liquid water  $((\text{Aerosol volume}_{\text{wet}} - \text{Aerosol volume}_{\text{dry}})/\text{Aerosol volume}_{\text{dry}})$  (Right axis) during February 29 to March 5, 2016.

65 **Figure S9.** Time series of the ratio of the extinction coefficient for 300~700 nm and the total  $\text{PM}_{10}$  in the presence of liquid water (Right axis) from February 29 to March 5, 2016.

**Table S1.** The classification of four modes of PNSD data (3 nm~10  $\mu\text{m}$ ) following results from long-term PNSD measurement in Beijing in Wu et al. (2008).

70

## Text S1. Measurement and methods

### 75 *Size-resolved particle hygroscopicity (H-TDMA)*

Size-resolved hygroscopicity of sub-micrometer aerosol particles (50, 100, 150, 250, 350 nm) at 90% RH was measured by Hygroscopicity Tandem Differential Mobility Analyzer (H-TDMA, TROPOS, Germany). A detailed description of instrumentation and data quality control were shown in the Massling et al. (2011) and Wang et al. (2018). Here, only a brief introduction will be given. Mono-  
80 disperse aerosol particles were selected by the first Differential Mobility Analyzer (DMA, TROPOS, Germany). After humidification at 90% RH, particle number size distribution of humidified aerosol particles was measured by the second DMA coupled with a condensation particle counter (CPC, Model 3772, TSI, USA). Thus, the measurement density function (MDF) was obtained. The MDF was validated and inverted with TDMA<sub>inv</sub> method (Gysel et al., 2009) to obtain particle's actual growth  
85 factor distribution (Growth Factor - Probability Density Function, GF-PDF). A series of Quality Assurance/Quality Control was adopted to ensure high-quality data. Ammonium sulfate aerosol particles were measured by H-TDMA every 4~5 hours during the campaign to ensure the stability and accuracy of RH in the system. The hygroscopicity of atmospheric aerosol particles in dry condition (RH<30%) was measured to validate the offset between measured HGF and 1 due to the different  
90 transfer functions of the two DMAs in the system. To eliminate the influences of RH fluctuation, all measured GF-PDFs in the condition of 87%<RH<93% were corrected to RH=90%. The equations of hygroscopic growth factor (*HGF*) and  $\kappa$  calculation are shown below:

The *HGF* of aerosol particles are defined as the particle mobility size at a given RH ( $D_{RH}$ ) divided by the dry size ( $D_0$ ):

$$95 \quad HGF = \frac{D_{RH}}{D_0} \quad [S1]$$

The hygroscopicity parameter ( $\kappa$ ) can be derived from  $HGF$  by  $\kappa$ -Köhler theory (Petters and Kreidenweis, 2007) in equation [S2-3].

$$\kappa = (HGF^3 - 1) \left( \frac{\exp\left(\frac{A}{D_0 \cdot HGF}\right)}{RH} - 1 \right) \quad [S2]$$

$$A = \frac{4\sigma_{s/a}M_w}{RT\rho_w} \quad [S3]$$

100 where  $HGF$  and  $D_0$  represent the growth factor at 90% RH and dry size, respectively.  $\sigma_{s/a}$  represents droplet surface tension (assumed to  $\sigma$  of the pure water, 0.0728 N/m<sup>2</sup>),  $M_w$  and  $\rho_w$  are molecular weight and density of water respectively,  $R$  is the universal gas constant, and  $T$  is the absolute temperature. The obtained size-resolved hygroscopic parameter ( $\kappa$ ) was used to calculate aerosol particle liquid water.

105

### ***Size-resolved non-refractory chemical composition in PM<sub>1</sub> (HR-ToF-AMS)***

A HR-ToF-AMS (High-Resolution Time-of-Flight Aerosol Mass Spectrometry, Aerodyne Research, Inc., USA) was applied to measure total mass concentration and size distribution of non-refractory chemical composition in PM<sub>1</sub>, including ammonium (NH<sub>4</sub><sup>+</sup>), nitrate (NO<sub>3</sub><sup>-</sup>), sulfate (SO<sub>4</sub><sup>2-</sup>),  
 110 chloride (Cl<sup>-</sup>), and organic compounds. Detailed instrumentation was described previously in DeCarlo et al. (2006).

Only specific parameters and settings for the Instrument used will be given here. The AMS used for this study was modified by a quadrupole filter between the ionization region and the mass spectrometer. As fragmentation patterns of  $\text{NH}_4^+$ ,  $\text{NO}_3^-$  and  $\text{SO}_4^{2-}$  were found to be comparable to  
115 standard AMS, it was shown that the quadrupole did not influence the transmission in the investigated  $m/z$  range (12~250 amu). Therefore, standard AMS data evaluation procedures were applied. Particle free air was used to determine detection limits for the AMS species throughout the whole campaign. The detection limit for organic (Org.),  $\text{NH}_4^+$ ,  $\text{NO}_3^-$ ,  $\text{SO}_4^{2-}$ , and  $\text{Cl}^-$  mass concentrations were  $0.424 \mu\text{g}/\text{m}^3$ ,  $0.005 \mu\text{g}/\text{m}^3$ ,  $0.029 \mu\text{g}/\text{m}^3$ ,  $0.011 \mu\text{g}/\text{m}^3$ ,  $0.023 \mu\text{g}/\text{m}^3$ , respectively.

120 Regular calibration was performed (approximately every 7~10 days; except during the 19 days of the Spring Festival break) using size-selected (350 nm) and dried  $\text{NH}_4\text{NO}_3$  particles and a CPC (Model 3786, TSI, USA) as described in previous studies (Jayne et al., 2000; Jimenez et al., 2003). An average ionization efficiency (i.e. total response factor including the transfer efficiency of the ToF-MS) of  $1.61 \pm 0.26 \times 10^{-8}$  was determined from all calibrations. This was subsequently used for the  
125 determination of aerosol particle mass concentrations. Compound specific relative ionization efficiencies (RIE) for  $\text{NH}_4^+$  and  $\text{SO}_4^{2-}$  were determined during following the standard calibration procedures. The RIE of Org,  $\text{NH}_4^+$ ,  $\text{NO}_3^-$ ,  $\text{SO}_4^{2-}$ ,  $\text{Cl}^-$  were 1.4,  $2.71 \pm 0.12$ , 1.1,  $1.54 \pm 0.04$ , 1.3, respectively.

A composition dependent correction factor was used to correct for non-unity collection  
130 efficiency (i.e. sampling of aerosol particles) (Middlebrook et al., 2012). Comparison of the retrieved AMS- $\text{PM}_1$  to  $\text{PM}_1$  determined by an allocated Mobility Particle Size Spectrometer (MPSS) system showed that the total mass measured by the AMS on average accounted for 84 % and 73 % of the mass

measured by the MPSS assuming an effective aerosol particle density of 1.4 g/cm<sup>3</sup> and 1.6 g/cm<sup>3</sup>, respectively. The density is expected to be within this range based the fact that the aerosol particle mass consists of at least 50 % NH<sub>4</sub>NO<sub>3</sub> and organics (both 1.4 g/cm<sup>3</sup>) and up to 50 % (NH<sub>4</sub>)<sub>2</sub>SO<sub>4</sub> (1.77 g/cm<sup>3</sup>) and NH<sub>4</sub>HSO<sub>4</sub> (1.78 g/cm<sup>3</sup>). Taking into account that, (i) the AMS can only detect the non-refractory part of the aerosol particles and (ii) slight differences in the size ranges covered by AMS and MPSS, the agreement of PM<sub>1</sub> mass concentration measured by the two instruments is reasonable and assures that the AMS data can be quantitatively interpreted.

The AMS was located inside the building and air was sampling air through a 0.18' inner diameter (ID) stainless steel inlet line (2m length) that was further connected to a 0.255' ID stainless steel line coated with SilcoInert® (7.3m length). The total sampling flow through the inlet line was 1.82 L/min and the residence time of the air was approximately 10 s. Although the outside temperature was varying from -19.2 °C to 19.0 °C, the temperature at the AMS inlet was rather constant in the range of 20.0 °C to 26.5 °C. A Nafion drier (RH < 6 %) was applied upstream of the AMS and subsequently, the flow was split to a CPC (Model 3786, TSI, USA, flow rate: 0.60 L/min). In front of the Nafion drier, an optical particle counter (OPC, Model 1.129, Grimm, Germany) took a subsample of 1.16 L/min.

Positive matrix factorization (SoFi tool, ME2, Francesco Canonaco, PSI) was used to separate primary and secondary sources to the measured organic aerosol particle fraction. The factor indicating primary organic sources from biomass burning (BBOA) could not be fully separated from other factors in a completely unconstrained PMF-run for the full data set. Therefore, the BBOA factor which was found in an unconstrained run of only the “clean period” was used to constrain it for the full dataset. The optimal solution to explain the current dataset was given by a 5-factor solution. This solution

contains 3 primary organic factors namely: biomass burning (BBOA), coal combustion (CCOA) and  
155 hydrocarbon like (HOA) as well as 2 oxygenated organic factors of one was more oxidized than the  
other factor (OOA1 - O/C ratio:0.32; OOA2 - O/C ratio: 0.48). OOA is frequently equated with  
secondary organic aerosol (SOA). Hence, the time series of mass concentration of primary organic  
aerosol (POA) and secondary organic aerosol (SOA) as well as the fraction of SOA in total organic was  
shown in Figure S1.

160

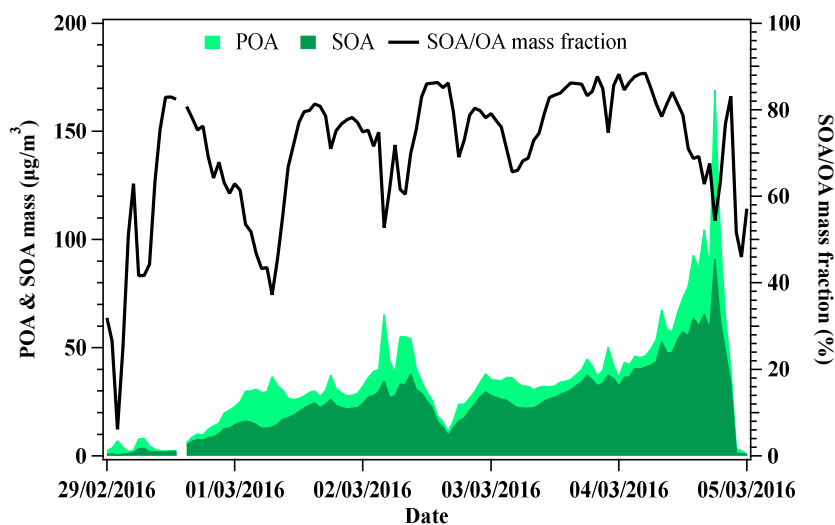

**Figure S1.** The time series of mass concentration of POA and SOA in non-refractory  $PM_{10}$  from ME2 (left axis) and the fraction of SOA in total organic (right axis) during the period from 29 February to 5 March, 2016.

165



To calculate the size-resolved light extinction coefficient by Mie scattering model and  $k_{N_2O_5}$ , the liquid water and chemical composition of size-resolved particles need to be re-distributed as their size distributions were different and can't be combined directly. Therefore, the liquid water and chemical composition were re-distributed to the values of 100~200 nm, 200~300 nm, 300~400 nm, 400~500nm, 500~600 nm and 600~700 nm in stokes diameter. Here, the re-distribution method of AMS data was introduced below. Figure S2 showed one of the examples of the size distribution of  $dM/d\log D_p$  in AMS data set. It is worth to note that particle size used in AMS was the aerodynamic diameter. Here, the optimized particle effective density of  $1.5 \text{ g/cm}^3$  was used to convert aerodynamic diameter to stokes diameter (Wu et al., 2016). That means the aerodynamic diameter of 150~300 nm, 300~450 nm, 450~600 nm, 600~750 nm, 750~900 nm, 900~1050 nm represents the stokes diameter of 100~200 nm, 200~300 nm, 300~400 nm, 400~500 nm, 500~600 nm, 600~700 nm respectively. As the  $dM/d\log D_p$  is normalized, the  $dM/d\log D_p$  of the particles in re-distribution size range was the sum of the  $dM/d\log D_p$  of the covered particle size (as shown in Figure S2). For example, the  $dM/d\log D_p$  for the 150~300 nm particles were the sum of  $dM/d\log D_p$  of 100~102.54 nm, 102.54~117.24 nm, 117.24~134.05 nm, 134.05~153.26 nm, 153.26~175.23 nm, 175.23~200.36 nm, 200.36~229.08 nm, 229.08~299.47 nm, 199.47~300 nm. Finally, the sized-resolved chemical composition of 100~200 nm, 200~300 nm, 300~400 nm, 400~500 nm, 500~600 nm and 600~700 nm in stokes diameter were derived. The re-distribution method of liquid water to the values of 100~200 nm, 200~300 nm, 300~400 nm, 400~500nm, 500~600 nm and 600~700 nm in stokes diameter followed similar procedure as described above and was not described repeatedly.

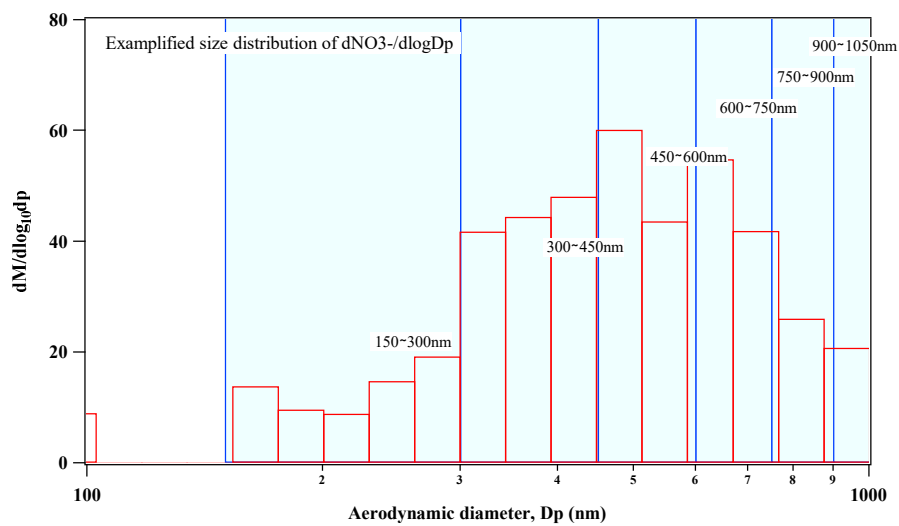

**Figure S2.** The exemplified size distribution of  $dM/d\log D_p$  and the classification of re-arranged aerodynamic diameter size range.

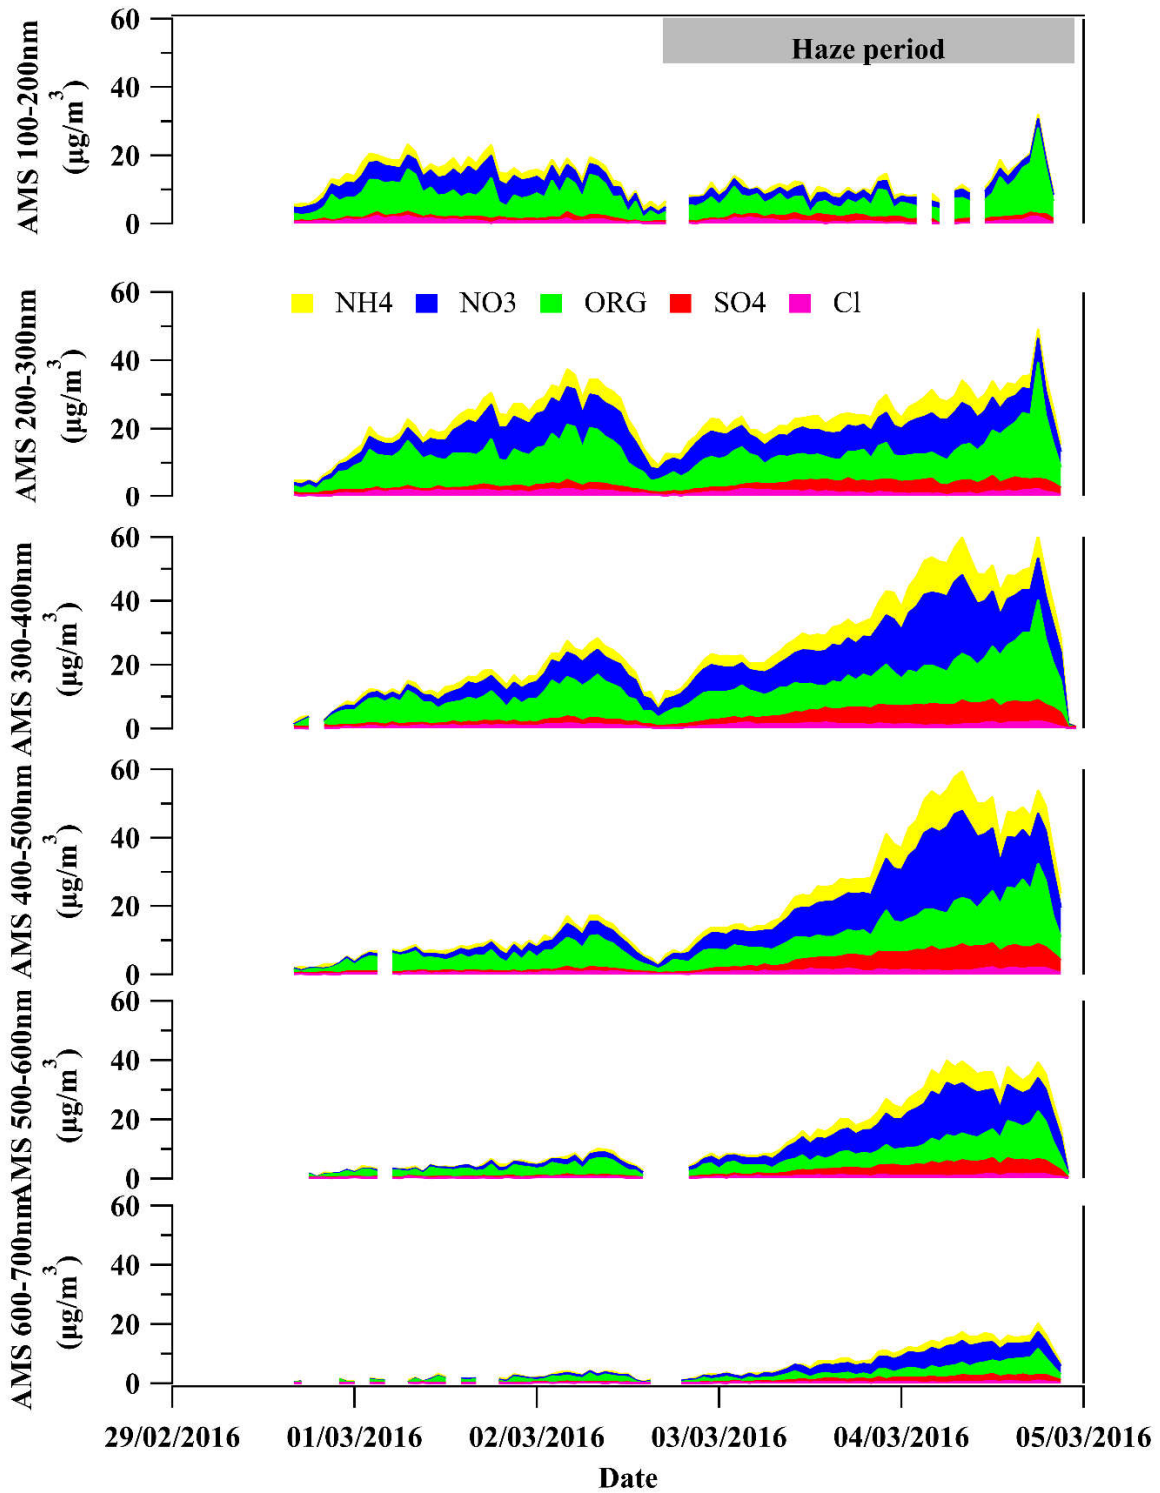

190 **Figure S3.** Average size distribution of  $\text{NH}_4^+$ ,  $\text{NO}_3^-$ ,  $\text{SO}_4^{2-}$ ,  $\text{Cl}^-$ , Org (in stokes diameter), in the period of February 29 to March 5, 2016. During the marked heavily polluted episode, nitrate showed size distribution and nitrate in 300~700 nm particles (especially 400~600 nm) showed rapid enhancement with the development of haze event compared with constant sulfate mass concentration.

***The measured mixing ratio of  $\text{NH}_3$  and  $\text{HNO}_3$  in the atmosphere (GAC-IC system)***

195 GAC-IC system (Gas Aerosol Collector-Ion Chromatography) was performed to provide the water-soluble chemical composition in the gas phase ( $\text{NH}_3$ ,  $\text{HCl}$ ,  $\text{HONO}$ ,  $\text{HNO}_3$ ,  $\text{SO}_2$ ) and aerosol particle phase ( $\text{NH}_4^+$ ,  $\text{Na}^+$ ,  $\text{K}^+$ ,  $\text{Mg}^{2+}$ ,  $\text{SO}_4^{2-}$ ,  $\text{NO}_3^-$ ,  $\text{Cl}^-$ ) with a time resolution of 30 mins. In this study, the measurement of gaseous  $\text{HNO}_3$  was used to investigate the partitioning equilibrium between the gas and particle phase. A detailed description of the instrumentation of GAC-IC system can be found in  
200 Dong et al. (2012). Briefly, ambient air was sampled by GAC-IC system. Sampling air was pumped through a wet denuder with coated absorption solution inside of denuder surface. Gaseous species were captured and collected by the wet denuder. Afterwards, particulate matter smaller than 2.5  $\mu\text{m}$  was scavenged and collected by an aerosol collector. Finally, both gaseous and aerosol particle samples were measured by IC system (ICS-90, Dionex, USA) to provide chemical composition of water-soluble  
205 species in gas and particle phase.

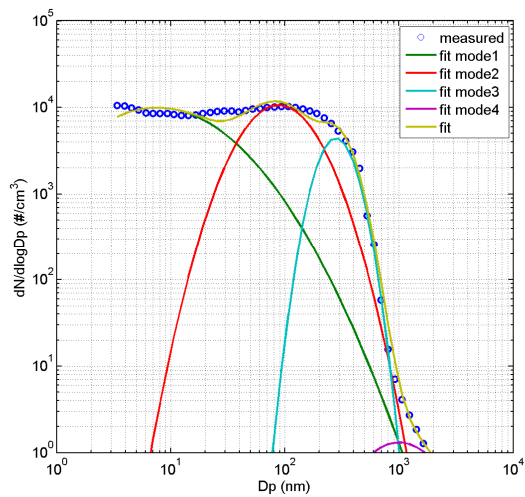

**Figure S4.** Comparison of particle number size distribution from measurement and four-mode lognormal fitting method.

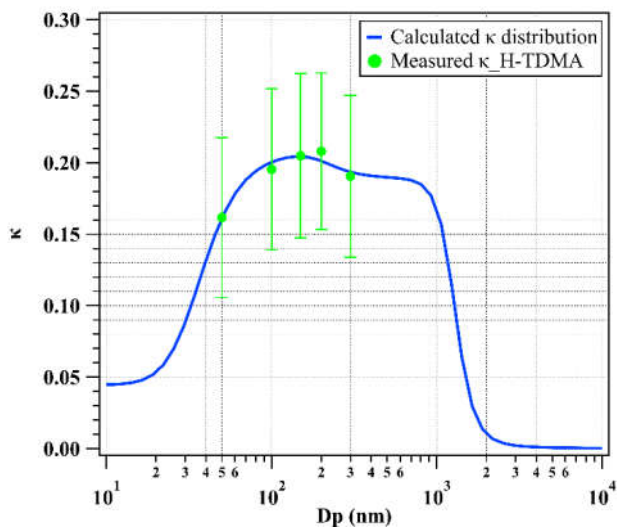

215 **Figure S5.** Comparison of sized-resolved  $\kappa$  from H-TDMA measurement and the calculated size distribution of  $\kappa$  from 3 nm to 10  $\mu\text{m}$ .

## S2 Results

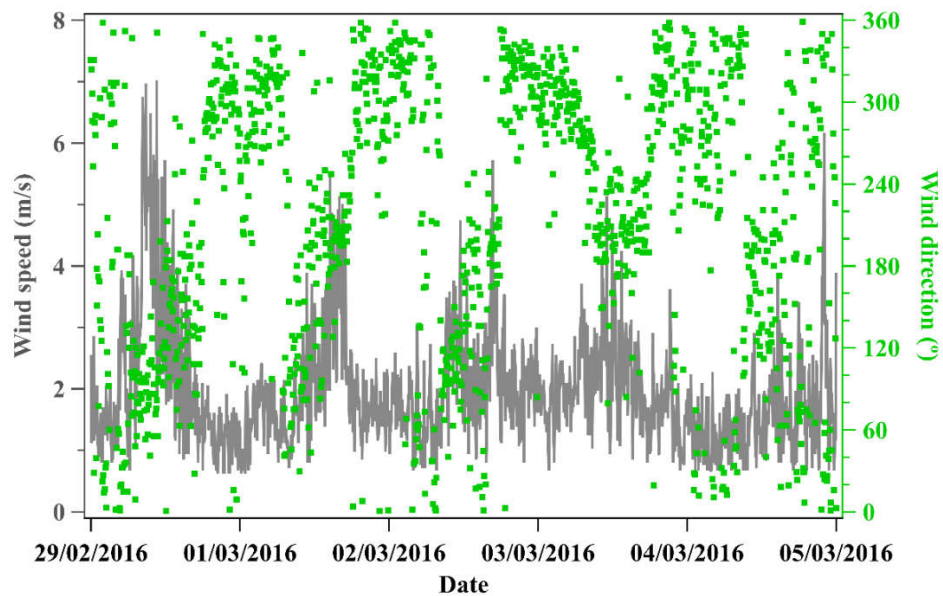

**Figure S6.** The time series of meteorological parameters during the period of February 29 to March 5, 2016.

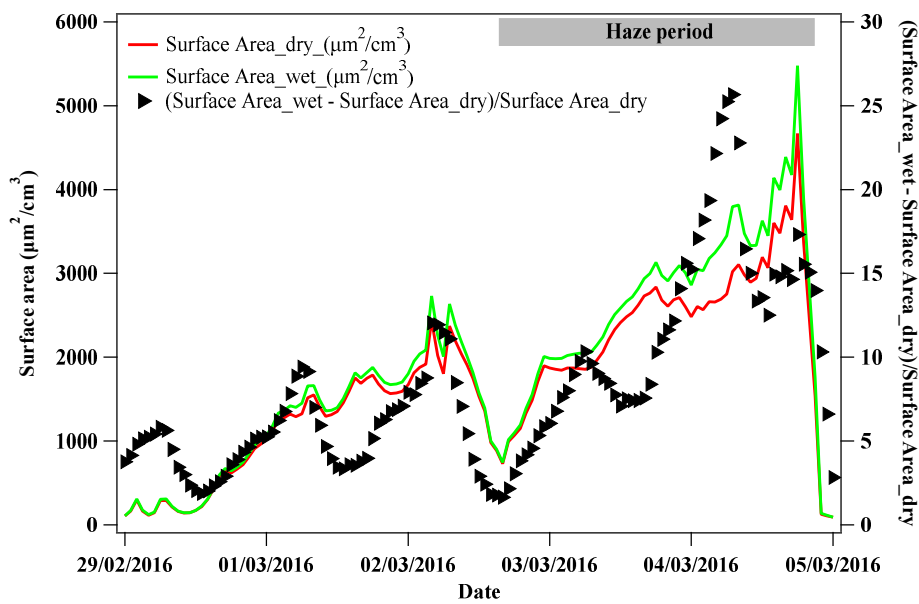

**Figure S7.** Time series of aerosol particle surface area in the absence and presence of aerosol particle liquid water (Left axis), as well as the ratio for a difference of surface area in the presence and absence of liquid water ( $(\text{Surface Area}_{\text{wet}} - \text{Surface Area}_{\text{dry}})/\text{Surface Area}_{\text{dry}}$ ) (Right axis) during February 29 to March 5, 2016. The ratio of  $(\text{Surface Area}_{\text{wet}} - \text{Surface Area}_{\text{dry}})/\text{Surface Area}_{\text{dry}}$  represents the aerosol particle surface area enhancement percentage due to the presence of liquid water compared to the dry condition.

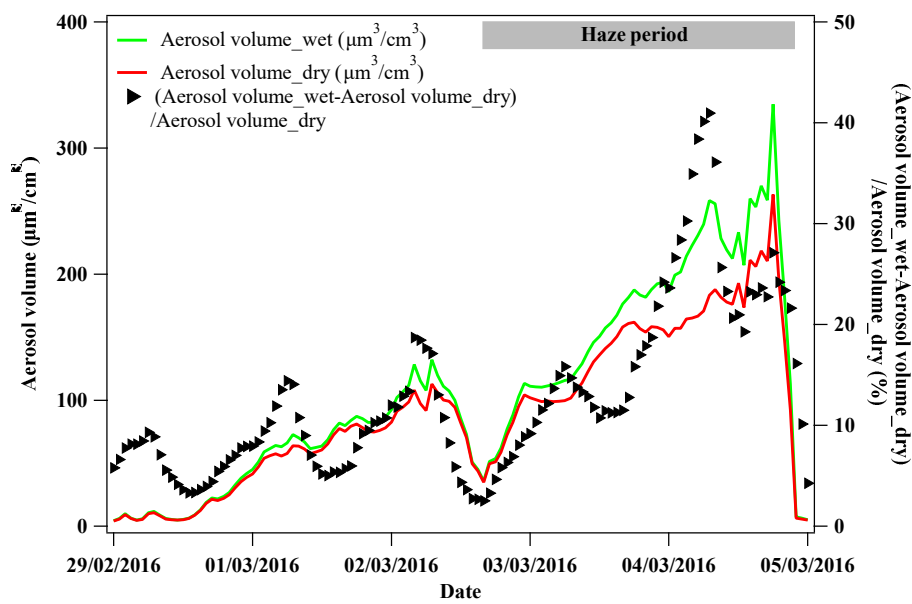

230

**Figure S8.** Time series of aerosol particle volume in the absence and presence of aerosol particle liquid water (Left axis), as well as the ratio for difference of aerosol particle volume in the presence and absence of liquid water  $((\text{Aerosol volume\_wet} - \text{Aerosol volume\_dry}) / \text{Aerosol volume\_dry})$  (Right axis) during February 29 to March 5, 2016. The ratio of  $(\text{Aerosol volume\_wet} - \text{Aerosol volume\_dry}) / \text{Aerosol volume\_dry}$  represents the aerosol particle volume enhancement percentage due to the presence of liquid water compared to the dry condition.

235



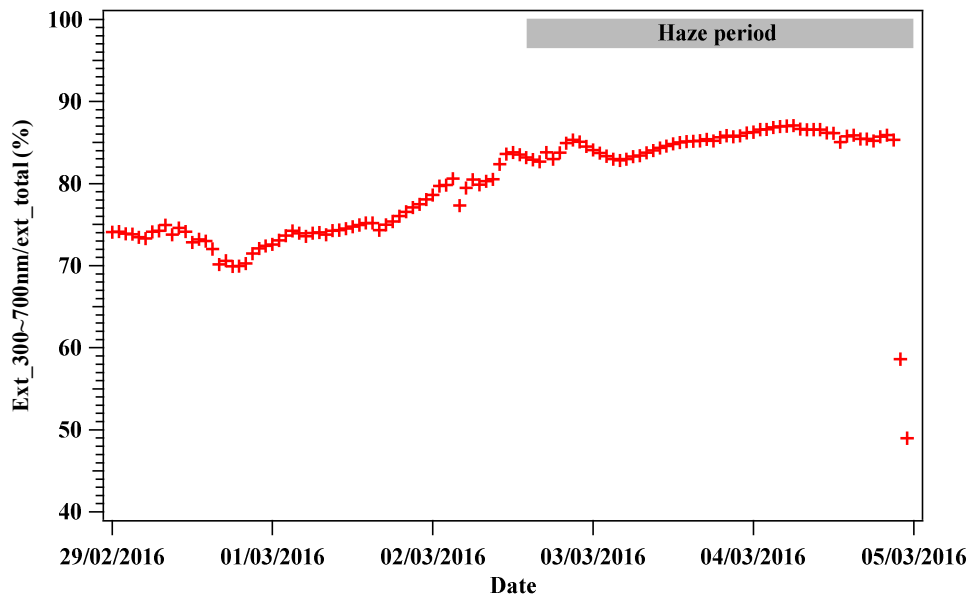

**Figure S9.** Time series of the ratio of the light extinction coefficient for 300~700 nm and the total  $PM_{10}$  in the presence of liquid water (Right axis) from February 29 to March 5, 2016.

240

**Table S1.** The classification of four modes of PNSD data (3 nm~10  $\mu\text{m}$ ) following results from long-term PNSD measurement in Beijing in Wu et al. (2008). Particles from coarse mode were assumed hydrophobic with  $\kappa_4 = 0$  following the method in Bian et al. (2014).

|                            | <b>Mode 1</b>   | <b>Mode 2</b> | <b>Mode 3</b>          | <b>Mode 4</b>                     |
|----------------------------|-----------------|---------------|------------------------|-----------------------------------|
| <b>Name</b>                | Nucleation mode | Aitken mode   | Accumulation mode      | Coarse mode                       |
| <b>Size range</b>          | 3-20 nm         | 20-100 nm     | 100 nm-1 $\mu\text{m}$ | 1 $\mu\text{m}$ -10 $\mu\text{m}$ |
| <b><math>\kappa</math></b> | $\kappa_1$      | $\kappa_2$    | $\kappa_3$             | $\kappa_4 = 0$                    |

245

## References:

- Bian, Y. X., Zhao, C. S., Ma, N., Chen, J., and Xu, W. Y.: A study of aerosol liquid water content based on hygroscopicity measurements at high relative humidity in the North China Plain, *Atmos. Chem. Phys.*, 14, 6417-6426, 10.5194/acp-14-6417-2014, 2014.
- 250 DeCarlo, P. F., Kimmel, J. R., Trimborn, A., Northway, M. J., Jayne, J. T., Aiken, A. C., Gonin, M., Fuhrer, K., Horvath, T., Docherty, K. S., Worsnop, D. R., and Jimenez, J. L.: Field-Deployable, High-Resolution, Time-of-Flight Aerosol Mass Spectrometer, *Analytical Chemistry*, 78, 8281-8289, 10.1021/ac061249n, 2006.
- Dong, H. B., Zeng, L. M., Hu, M., Wu, Y. S., Zhang, Y. H., Slanina, J., Zheng, M., Wang, Z. F., and Jansen, R.: Technical Note: The application of an improved gas and aerosol collector for ambient air pollutants in China, *Atmos. Chem. Phys.*, 12, 10519-10533, 10.5194/acp-12-10519-2012, 2012.
- 255 Gysel, M., Mcfiggans, G., and Coe, H.: Inversion of tandem differential mobility analyser (TDMA) measurements, 2, 134-151 pp., 2009.
- Jayne, J. T., Leard, D. C., Zhang, X., Davidovits, P., Smith, K. A., Kolb, C. E., and Worsnop, D. R.: Development of an Aerosol Mass Spectrometer for Size and Composition Analysis of Submicron Particles, *Aerosol Science and Technology*, 33, 49-70, 10.1080/027868200410840, 2000.
- 260 Jimenez, J. L., Jayne, J. T., Shi, Q., Kolb, C. E., Worsnop, D. R., Yourshaw, I., Seinfeld, J. H., Flagan, R. C., Zhang, X., Smith, K. A., Morris, J. W., and Davidovits, P.: Ambient aerosol sampling using the Aerodyne Aerosol Mass Spectrometer, *Journal of Geophysical Research: Atmospheres*, 108, doi:10.1029/2001JD001213, 2003.
- Massling, A., Niedermeier, N., Hennig, T., Fors, E. O., Swietlicki, E., Ehn, M., Hämeri, K., Villani, P., Laj, P., 265 Good, N., McFiggans, G., and Wiedensohler, A.: Results and recommendations from an intercomparison of six Hygroscopicity-TDMA systems, *Atmos. Meas. Tech.*, 4, 485-497, 10.5194/amt-4-485-2011, 2011.
- Middlebrook, A. M., Bahreini, R., Jimenez, J. L., and Canagaratna, M. R.: Evaluation of Composition-Dependent Collection Efficiencies for the Aerodyne Aerosol Mass Spectrometer using Field Data, *Aerosol Science and Technology*, 46, 258-271, 10.1080/02786826.2011.620041, 2012.
- 270 Petters, M. D., and Kreidenweis, S. M.: A single parameter representation of hygroscopic growth and cloud condensation nucleus activity, *Atmos. Chem. Phys.*, 7, 1961-1971, 10.5194/acp-7-1961-2007, 2007.
- Seinfeld, J. H., and Pandis, S. N.: *Atmospheric Chemistry and Physics: from air pollution to climate change*, John Wiley & Sons, INC, 2006.
- 275 Wang, Y., Wu, Z., Ma, N., Wu, Y., Zeng, L., Zhao, C., and Wiedensohler, A.: Statistical analysis and parameterization of the hygroscopic growth of the sub-micrometer urban background aerosol in Beijing, *Atmospheric Environment*, 175, 184-191, <https://doi.org/10.1016/j.atmosenv.2017.12.003>, 2018.
- Wu, Z., Hu, M., Lin, P., Liu, S., Wehner, B., and Wiedensohler, A.: Particle number size distribution in the urban atmosphere of Beijing, China, 7967-7980 pp., 2008.
- 280 Wu, Z. J., Zheng, J., Shang, D. J., Du, Z. F., Wu, Y. S., Zeng, L. M., Wiedensohler, A., and Hu, M.: Particle hygroscopicity and its link to chemical composition in the urban atmosphere of Beijing, China, during summertime, *Atmos. Chem. Phys.*, 16, 1123-1138, 10.5194/acp-16-1123-2016, 2016.
